# Supplementary material for: Comparison of the effects of empagliflozin and sotagliflozin on a zebrafish model of diabetic heart failure with reduced ejection fraction
Source: PubMed Central journal article supplement (PMC10318005; doi:10.1038/s12276-023-01002-3), 2023-06-01
Supplement: 12276_2023_1002_MOESM1_ESM.pdf [file 12276_2023_1002_MOESM1_ESM.pdf]

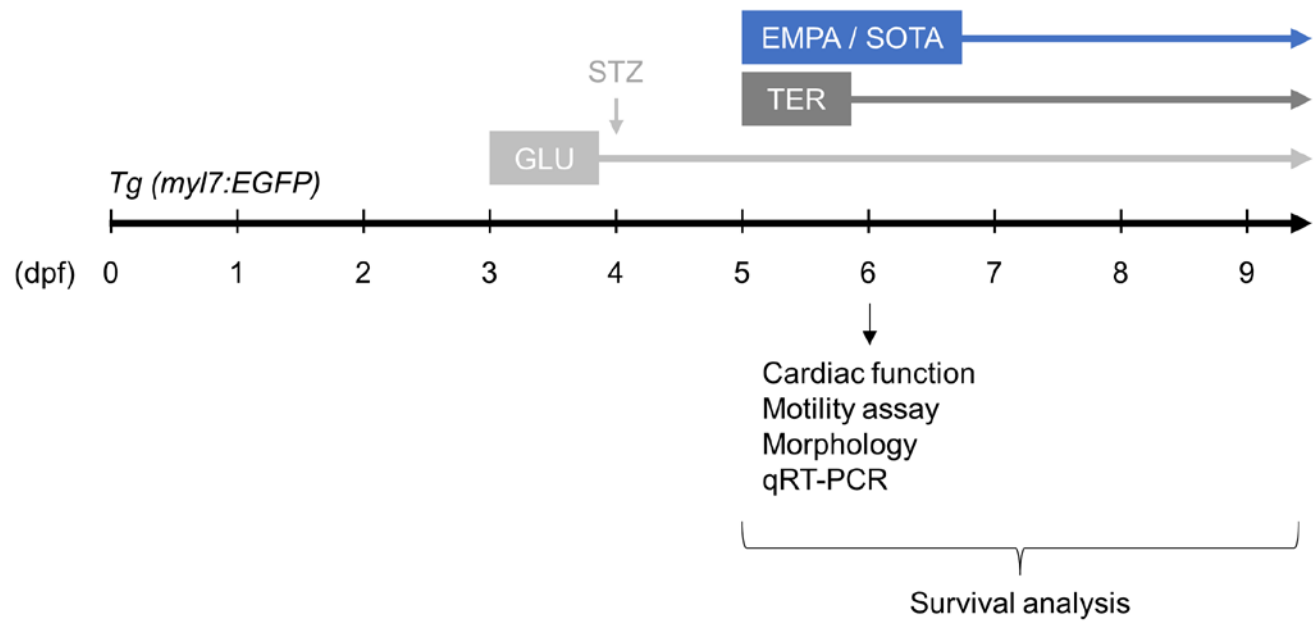

**Supplementary Fig. 1. Schematic of the study design.**

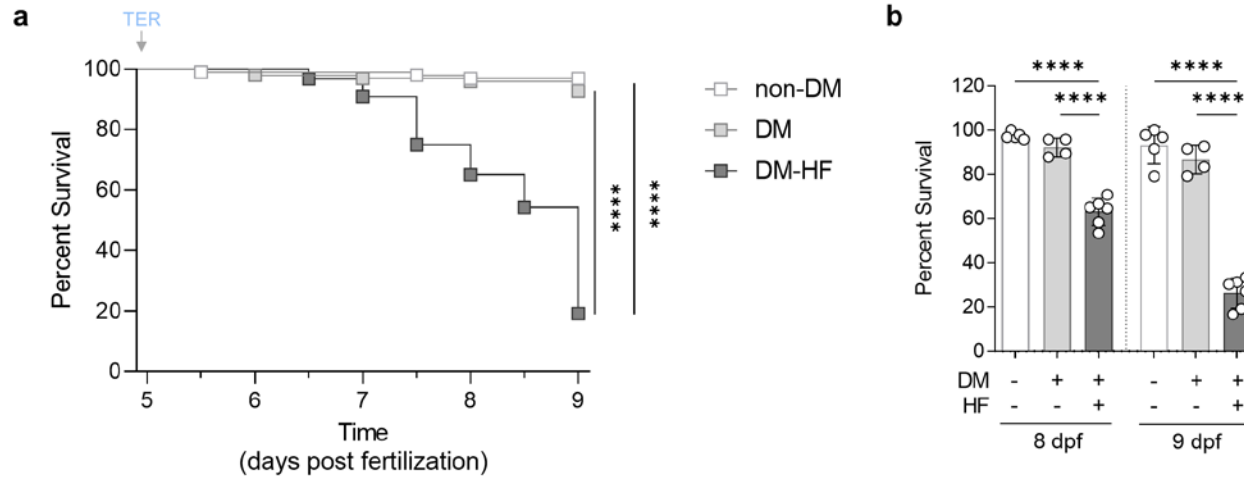

**Supplementary Fig. 2. Survival rates of non-DM, DM and DM-HF zebrafish.** (a) Kaplan-Meier survival analysis of non-DM, DM, and DM-HF zebrafish larvae. (b) Survival rate at 8 and 9 dpf (n = 96-120 per group). All groups were tested under the same conditions, and the graphs are shown to Fig. 1 and Supplementary Fig. 2. Data are presented as the mean  $\pm$  standard deviation and each dot represents the value of each experiment. \*\*\*\*p<0.0001 vs. indicated group.

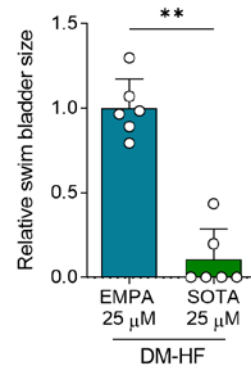

**Supplementary Fig. 3. Defect of swim bladder in high molarity sotagliflozin treated DM-HFrEF zebrafish.** Relative swim bladder size in DM-HF zebrafish treated with 25 μM empagliflozin or sotagliflozin (n = 6 per group). Data are presented as mean ± standard deviation and each dot represents the value of each zebrafish larva. \*\*  $p < 0.01$  vs. indicated group.

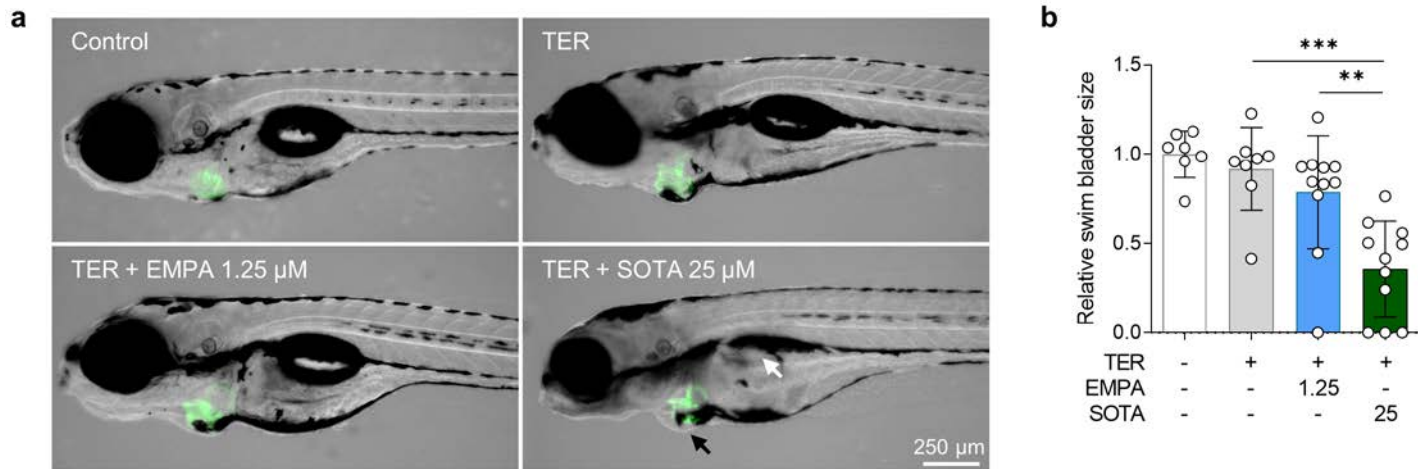

**Supplementary Fig. 4. Pericardial edema and uninflated swim bladder in high dose sotagliflozin treated HF induced non-DM zebrafish. (a)**

Representative morphological images. The pericardial edema is indicated by a black arrow, and uninflated swim bladder is indicated by a white

arrow. **(b)** Relative swim bladder size in non-DM with HF zebrafish treated with 1.25  $\mu\text{M}$  empagliflozin or 25  $\mu\text{M}$  sotagliflozin (n = 7-11 larvae

per group). Data are presented as mean  $\pm$  standard deviation and each dot represents the value of each zebrafish larva. \*\*  $p < 0.01$ , \*\*\*  $p < 0.001$

vs. indicated group.

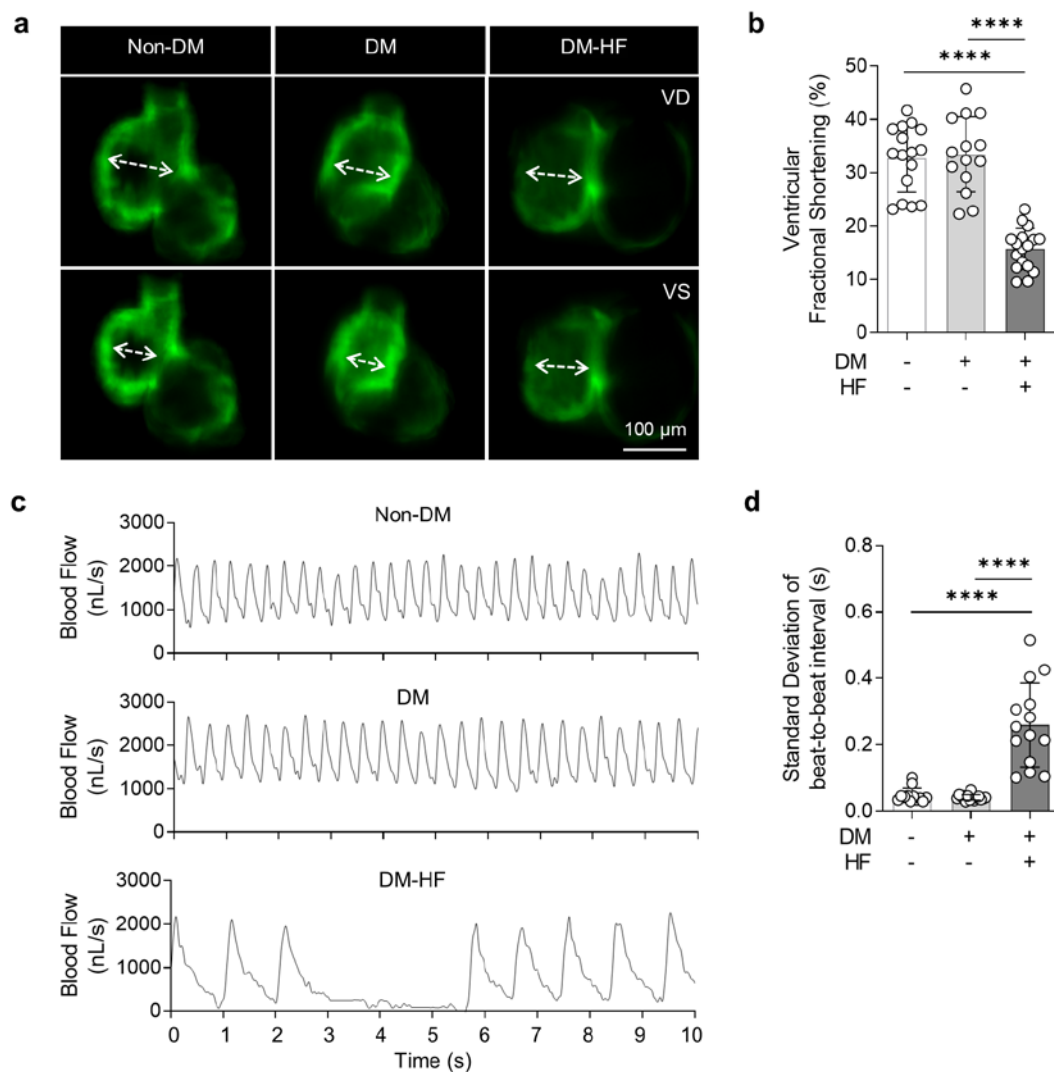

**Supplementary Fig. 5. Cardiac contractile functions in the DM-HFrEF zebrafish model.** (a) Representative fluorescent microscopy images of *Tg (myl7:EGFP)* zebrafish heart with a green fluorescent protein (GFP). (b) Ventricular fractional shortening calculated based on fluorescent images. (n=14-17 per group). (c) Representative blood flow graphs. (d) Standard deviation of beat-to-beat interval analyzed based on blood flow (n = 12-15 per group). Data are presented as mean  $\pm$  standard deviation and each dot represents the value of each zebrafish larvae. \*\*\*\*p < 0.0001 vs. indicated group.

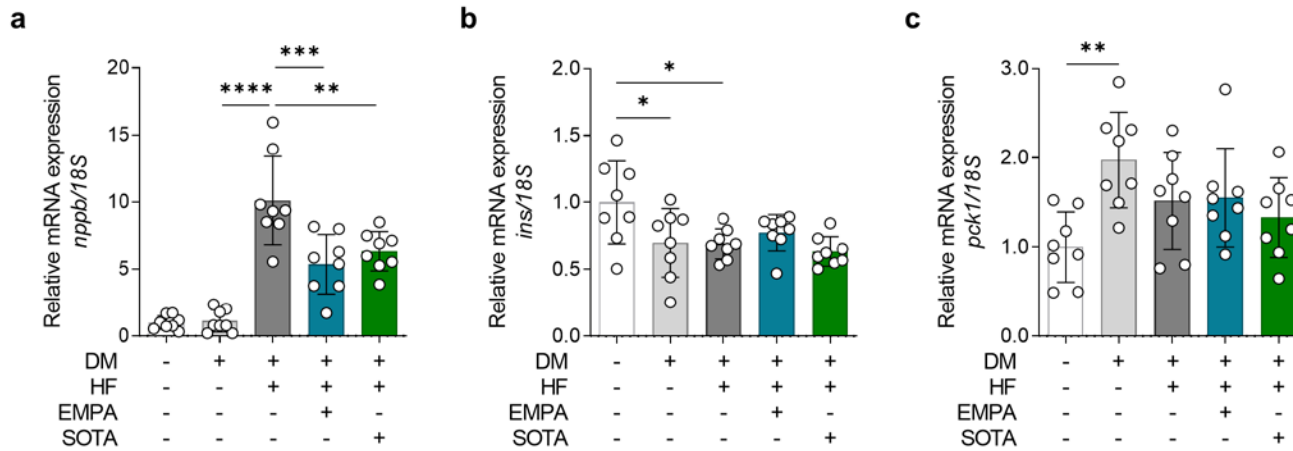

**Supplementary Fig. 6. Expression of heart failure marker and glucose metabolism-related genes in DM-HF zebrafish treated with empagliflozin or sotagliflozin. (a) Relative mRNA expression of *nppb* (b) *ins* and (c) *pck1* (n = 8 per group). Each group had 8 samples, with 10 larvae per sample. Data are presented as mean  $\pm$  standard deviation and each dot represents the value of each sample. \*  $p < 0.05$ , \*\*  $p < 0.01$ , \*\*\*  $p < 0.001$ , \*\*\*\*  $p < 0.0001$  vs. indicated group.**

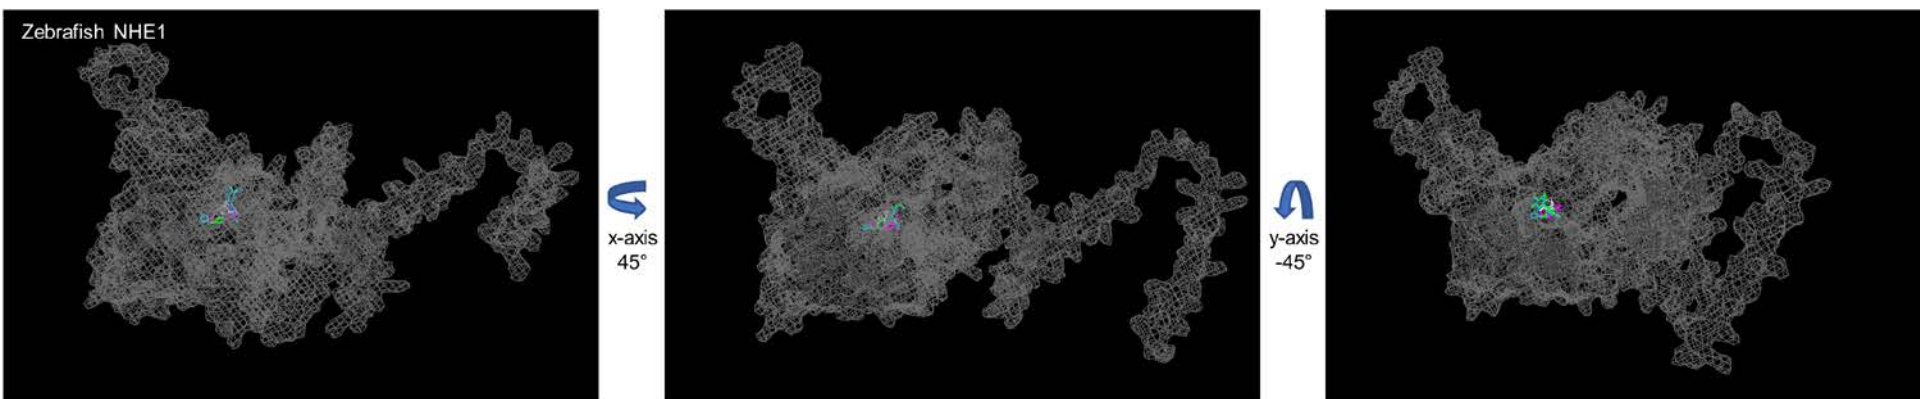

**Supplementary Fig. 7. Orientation of the zebrafish NHE1 structural model for molecular docking analysis *in silico*.** Orientation strategy of the zebrafish NHE1 structure prediction model for molecular docking analysis of empagliflozin, sotagliflozin, cariporide and D-glucose.

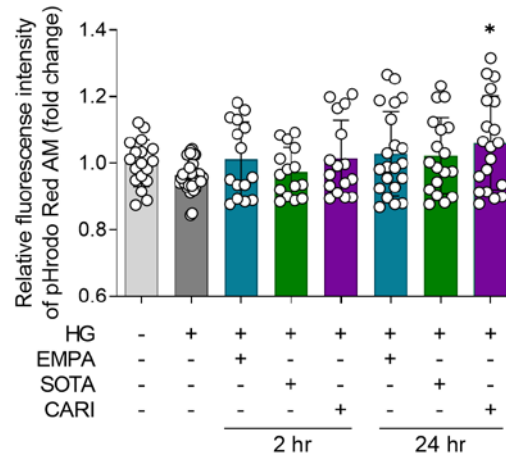

**Supplementary Fig. 8. Intracellular H<sup>+</sup> concentration in empagliflozin or sotagliflozin treated cells.** pHrodo Red AM for intracellular H<sup>+</sup> (n = 15-34 samples per group). Data are presented as mean  $\pm$  standard deviation and each dot represents the value of each sample. \* p < 0.05, \*\*\* vs. HG group.



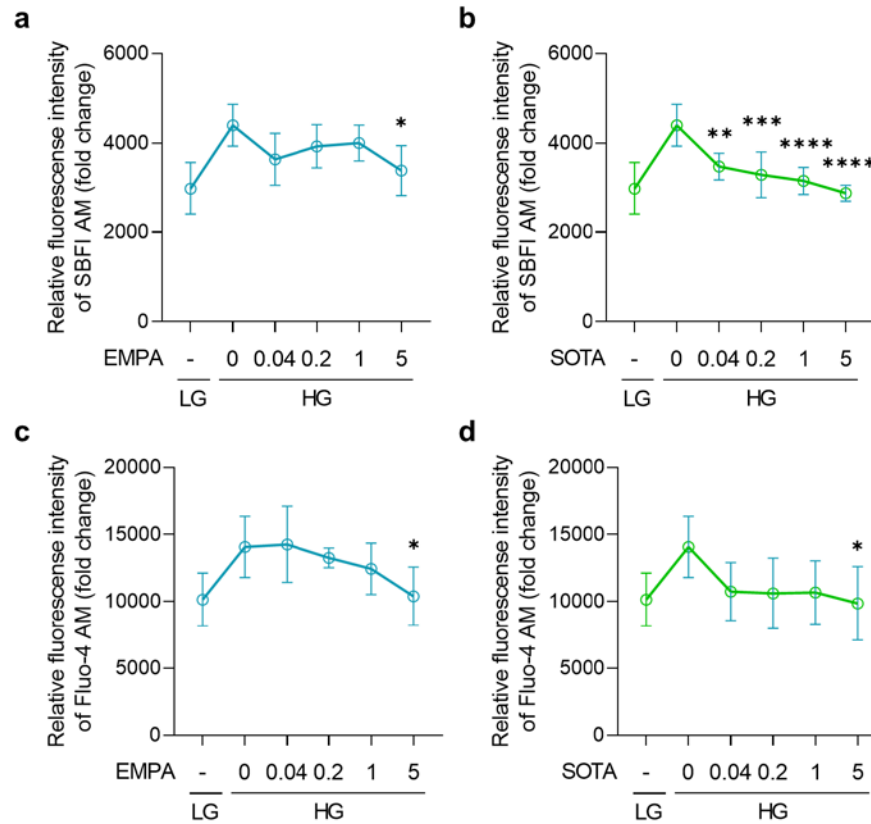

**Supplementary Fig. 9. Intracellular Na<sup>+</sup> and Ca<sup>2+</sup> concentrations treatment with empagliflozin or sotagliflozin in a dose-dependent manner.** Measurement of intracellular Na<sup>+</sup>, and Ca<sup>2+</sup> for the analysis of the NHE1 functional inhibitory effect of empagliflozin or sotagliflozin. (**a** and **b**) SBF1 AM for intracellular Na<sup>+</sup>, and (**c** and **d**) Fluo-4 AM for intracellular Ca<sup>2+</sup> (n = 6-8 samples per group). Data are presented as mean ± standard deviation and each dot represents the value of each sample. \* p < 0.05, \*\* p < 0.01, \*\*\* p < 0.001, \*\*\*\* p < 0.0001 vs. HG group.

|                            | Empagliflozin        | Sotagliflozin |
|----------------------------|----------------------|---------------|
| Molarity ( $\mu\text{M}$ ) | Concentration (mg/L) |               |
| 0.2                        | 0.0902               | 0.0850        |
| 1                          | 0.4509               | 0.4249        |
| 5                          | 2.2546               | 2.1247        |
| 25                         | 11.2728              | 10.6235       |

**Supplementary Table 1. Molarity of Empagliflozin and Sotagliflozin used in the experiment**
